# Supplementary material for: Acoustic correlates of body size and individual identity in banded penguins
Source: PubMed Central journal article supplement (PMC5310857; doi:10.1371/journal.pone.0170001), 2017-02-15
Supplement: pone.0170001.s001.pdf [file pone.0170001.s001.pdf]

## Acoustic correlates of body size and individual identity in banded penguins

Livio Favaro\*, Marco Gamba, Claudia Gili, Daniela Pessani

\* E-mail: livio.favaro@unito.it

**S1 Table.** Vocal contribution for each penguin.

| Species                                                  | Name        | Sex | Ecstatic display songs |
|----------------------------------------------------------|-------------|-----|------------------------|
| Humboldt penguin<br>( <i>Spheniscus humboldti</i> )      | Bhaji       | F   | 9                      |
|                                                          | Biancorosso | F   | 18                     |
|                                                          | Josh        | M   | 11                     |
|                                                          | Masala      | M   | 62                     |
|                                                          | Rogan       | M   | 11                     |
|                                                          | Tris        | M   | 52                     |
| Magellanic penguin<br>( <i>Spheniscus magellanicus</i> ) | Attila      | F   | 11                     |
|                                                          | Bigfoot     | M   | 31                     |
|                                                          | Bull        | F   | 7                      |
|                                                          | Diana       | F   | 10                     |
|                                                          | Giallo      | M   | 7                      |
|                                                          | Hungry      | F   | 10                     |
|                                                          | Rossogiallo | F   | 14                     |
|                                                          | Rossonero   | M   | 15                     |
|                                                          | Susi        | F   | 37                     |
|                                                          | Tyson       | M   | 32                     |
|                                                          | Verde       | M   | 13                     |
| Verdenara                                                | F           | 7   |                        |
