# Supplementary material for: Acoustic correlates of body size and individual identity in banded penguins
Source: PubMed Central journal article supplement (PMC5310857; doi:10.1371/journal.pone.0170001), 2017-02-15
Supplement: pone.0170001.s002.pdf [file pone.0170001.s002.pdf]

## Acoustic correlates of body size and individual identity in banded penguins

Livio Favaro\*, Marco Gamba, Claudia Gili, Daniela Pessani

\* E-mail: livio.favaro@unito.it

**S2 Table.** Tests for the canonical discriminant functions established to discriminate among individuals in Humboldt penguins.

| Function | Eigenvalue | Variance explained | Test of Function | Wilks's $\lambda$ | $\chi^2$ | df | Significance |
|----------|------------|--------------------|------------------|-------------------|----------|----|--------------|
| 1        | 2.245      | 57.9%              | 1 – 4            | 0.102             | 357.829  | 20 | $P < 0.001$  |
| 2        | 1.363      | 35.2%              | 2 – 4            | 0.332             | 173.040  | 12 | $P < 0.001$  |
| 3        | 0.248      | 6.4%               | 3 – 4            | 0.785             | 38.036   | 6  | $P < 0.001$  |
| 4        | 0.021      | 6%                 | 4                | 0.979             | 3.313    | 2  | $P = 0.191$  |
