# Supplementary material for: Acoustic correlates of body size and individual identity in banded penguins
Source: PubMed Central journal article supplement (PMC5310857; doi:10.1371/journal.pone.0170001), 2017-02-15
Supplement: pone.0170001.s003.pdf [file pone.0170001.s003.pdf]

## Acoustic correlates of body size and individual identity in banded penguins

Livio Favaro\*, Marco Gamba, Claudia Gili, Daniela Pessani

\* E-mail: livio.favaro@unito.it

**S3 Table.** Tests for the canonical discriminant functions established to discriminate among individuals in Magellanic penguins.

| Function | Eigenvalue | Variance explained | Test of Function | Wilks's $\lambda$ | $\chi^2$ | df | Significance |
|----------|------------|--------------------|------------------|-------------------|----------|----|--------------|
| 1        | 4.776      | 52.2%              | 1 – 6            | 0.12              | 809.257  |    | $P < 0.001$  |
| 2        | 2.623      | 28.7%              | 2 – 6            | 0.71              | 486.569  |    | $P < 0.001$  |
| 3        | 0.939      | 10.3%              | 3 – 6            | 0.257             | 249.687  |    | $P < 0.001$  |
| 4        | 0.488      | 5.3%               | 4 – 6            | 0.499             | 127.894  |    | $P < 0.001$  |
| 5        | 0.205      | 2.2%               | 5 – 6            | 0.742             | 54.818   |    | $P < 0.001$  |
| 6        | 0.118      | 1.3%               | 6                | 0.895             | 20.473   |    | $P < 0.001$  |
